# Supplementary material for: S/V co-doped Ni 2 P microflowers enable efficient and stable saline water electrolysis through local microenvironment engineering
Source: Royal Society of Chemistry journal article supplement (doi:10.1039/d5qi01984b), 2026-01-01
Supplement: d5qi01984b1.pdf [file d5qi01984b1.pdf]

## **S/V Co-Doped Ni<sub>2</sub>P Microflowers Enable Efficient and Stable Saline Water Electrolysis through Local Microenvironment Engineering**

Jiahui Jiang,<sup>a</sup> Yixuan Li,<sup>a</sup> Guancheng Xu,<sup>a,\*</sup> Bingbing Gong,<sup>b</sup> Weiwei Wang,<sup>c</sup> Hao Jiang,<sup>b,\*</sup> Li Zhang<sup>b,\*</sup>

a. State Key Laboratory of Chemistry and Utilization of Carbon Based Energy Resources; College of Chemistry, Xinjiang University, Urumqi, 830017, Xinjiang, PR China.

b. College of Chemical Engineering, Xinjiang University, Urumqi, 830017, Xinjiang, PR China.

c. School of Materials Science and Engineering Xinjiang University, Urumqi, Xinjiang, 830046 China.

\* Corresponding author

E-mail: zhangli420@xju.edu.cn, jianghao@xju.edu.cn, xuguancheng@xju.edu.cn,

### **Material characterization**

Phase compositions of the as-made materials were taken on D 8 advance (Germany Bruker) X-ray diffractometer (XRD) with Cu K $\alpha$  radiation ( $\lambda=0.15405$  nm). Morphologies of the samples were obtained on a field-emission scanning electronic microscopy (FE-SEM, Hitachi S-4800 microscope) and a high-resolution transmission electronic microscopy (HR-TEM, Hitachi H600 microscope) at an acceleration voltage of 200 kV. At the same time, the elemental content and distribution of the compounds were analyzed by X-ray energy dispersive spectroscopy (EDX) and elemental mapping (HR-TEM, Hitachi H600 microscope). Transmission electron microscopy (TEM) were performed on a Hitachi H600 microscope. X-ray photoelectron spectroscopy (XPS) measurements were performed on a Thermo Fisher Scientific Escalab 250 Xi system operated at 15 kW with a monochromatic Al K $\alpha$  source, and a base pressure less than  $1\times 10^{-10}$  Mpa under ultra-high vacuum (UHV) and no dust conditions (pass energy = 50.0 eV, dwell time = 136 s, number of scan = 1,

spot size = 500  $\mu\text{m}$ ). Raman spectra were obtained on a confocal microscope-based Raman spectrometer (HR Evolution, incident power of 0.15 mW, laser wavelength of 532 nm).

### Electrochemical measurements

All electrochemical measurements were tested on CHI-760E electrochemical workstation with a standard three-electrode system. The obtained materials (1 cm $\times$ 0.5 cm), Hg/HgO and Graphite rod electrode were used as the working electrode, reference electrode and counter electrode, respectively. All electrochemical tests, including linear sweep voltammograms (LSV), cyclic voltammetry (CV) and electrochemical impedance spectroscopy (EIS) were performed in an 1.0 M KOH aqueous solution at room temperature. All measured potentials were calibrated to a reversible hydrogen electrode (RHE) by using the Nernst equation:

$$E(\text{RHE}) = E(\text{Hg/HgO}) + (0.098 + 0.059 \text{ pH}) \text{ V} \quad \text{Equation (1)}$$

### Laviron equation:

$$E_p = E_{1/2} - \left( \frac{RT}{\alpha n F} \right) \times \ln \left( \frac{\alpha n F}{RT k_s} \right) - \left( \frac{RT}{\alpha n F} \right) v \times \ln(v) \quad \text{Equation (1)}$$

$E_p$  is the reduction potential of metal redox,  $E_{1/2}$  is the formal potential of metal redox,  $R$  is universal gas constant,  $T$  is temperature in Kelvin,  $n$  is number of electrons transferred,  $F$  is the Faraday constant,  $\alpha$  is the transfer coefficient,  $k_s$  is the rate constant of metal redox, and  $v$  is scan rate in the CV measurement. The  $k_s$  and  $\alpha$  values can be obtained from the intercept and slope of the linear graph of  $E_c$  against  $\ln(v)$ .

### Faraday efficiency calculation

The Faraday efficiencies of the S,V-Ni<sub>2</sub>P/NF during the HER/OER were calculated based on the ratio of the volume of actual ( $V_{\text{actual}}$ ) H<sub>2</sub>/O<sub>2</sub> evolved to the theoretical one ( $V_{\text{theoretical}}$ ):

$$\text{Faraday efficiency} = \frac{V_{\text{actual}}}{V_{\text{theoretical}}} \times 100\%$$

The actual volumes of generated H<sub>2</sub>/O<sub>2</sub> gas was gathered using the drainage method. The theoretical volume can be calculated using the formula:

$$V_{\text{theoretical}} = \frac{I \cdot t \cdot V_m}{z \cdot F}$$

where  $I$  is current (A),  $t$  is time (s),  $V_m$  is molar volume of  $\text{H}_2/\text{O}_2$  gas ( $28.004 \text{ L mol}^{-1}$ ,  $303.15 \text{ K}$ ,  $90 \text{ kPa}$  in Urumqi, Xinjiang),  $F$  is the Faraday constant ( $96485 \text{ C mol}^{-1}$ ),  $z$  is electron number transferred per molecule ( $z$  is 2 and 4 for HER and OER, respectively).

### Calculation method

All calculations were carried out using spin-polarized and periodic DFT implemented in the Vienna Ab initio Simulation Package (VASP) code<sup>1</sup>. The exchange-correlation potential was treated by using a generalized gradient approximation (GGA) with the Perdew-Burke-Ernzerhof (PBE) parametrization<sup>2</sup>. The van der Waals correction of Grimme's DFT-D3 model was also adopted<sup>3</sup>. Meanwhile, a vacuum region of about  $15 \text{ \AA}$  was applied to avoid the interaction between adjacent images. The energy cutoff was set to be  $450 \text{ eV}$ . The Brillouin-zone integration was sampled with a  $\Gamma$ -centered Monkhorst-Pack mesh<sup>4</sup> of  $3 \times 3 \times 1$ . The structures were fully relaxed until the maximum force on each atom was less than  $0.02 \text{ eV/\AA}$ , and the energy convergent standard was  $10^{-5} \text{ eV}$ . The different charge density can be defined as  $\Delta\rho = \rho_{\text{surface}} - \rho_{\text{atoms}} - \rho_{\text{slab}}$ , where  $\rho_{\text{surface}}$ ,  $\rho_{\text{atoms}}$ , and  $\rho_{\text{slab}}$  are the electron densities of the  $\text{Ni}_2\text{P}$  and  $\text{S,V-Ni}_2\text{P}$ , the isolated Ni and P (V and S) atoms, and except for the rest of the surface behind the Ni and P (V and S) atoms, respectively. The Adsorption energy ( $\Delta E$ ) is defined as,  $\Delta E = E_{*H} - E_{*} - E_H$ , where  $E_{*H}$  is the energy adsorbed by the  $*H$  on the surface,  $E_{*}$  is the energy of the surface, and  $E_H$  is the energy of the H atom under vacuum. The Gibbs free energy change ( $\Delta G$ ) for each elementary steps of proton-coupled electron ( $\text{H}^+ + \text{e}^-$ ) transfer (PCET) was calculated, which has proved to be the valid first-principles computational electrochemistry technique:  $\Delta G = \Delta E + \Delta E_{\text{ZPE}} - T\Delta S + \Delta G_{\text{pH}}$ , where  $\Delta E$ ,  $\Delta E_{\text{ZPE}}$ , and  $\Delta S$  are the electronic energy, zero-point energy, and entropy change obtained from DFT calculations,  $T$  is the temperature ( $T = 298.15 \text{ K}$ ),  $\Delta G_{\text{pH}} = k_B T \ln 10 \times \text{pH}$  ( $\text{pH} = 14$  in this work) corresponding to the correction of free energy due to the variation in  $\text{H}^+$

concentration.

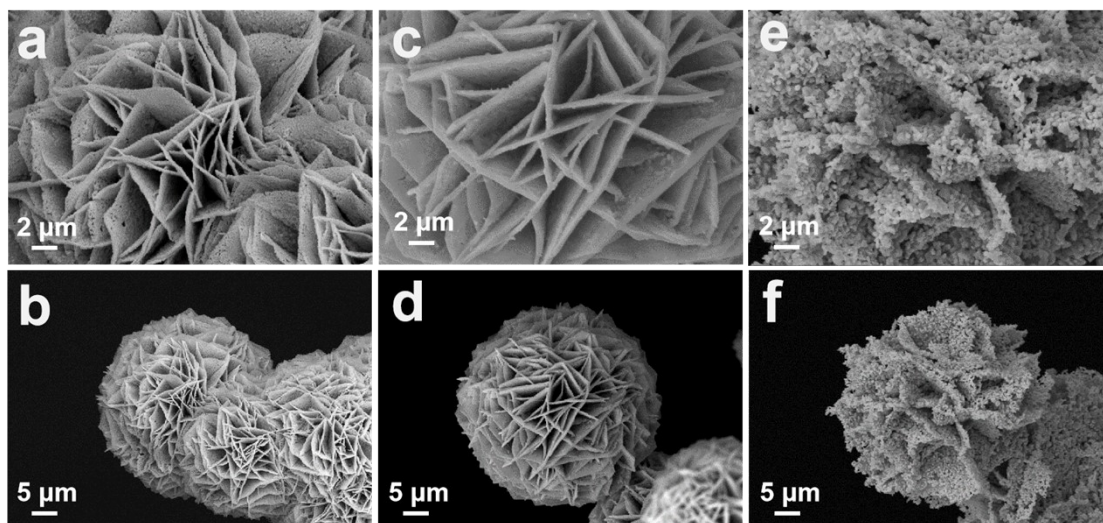

**Figure S1.** SEM images of (a, b) S, V-Ni<sub>2</sub>P/NF; (c, d) V-Ni<sub>2</sub>P/NF; (e, f) S-Ni<sub>2</sub>P/NF.

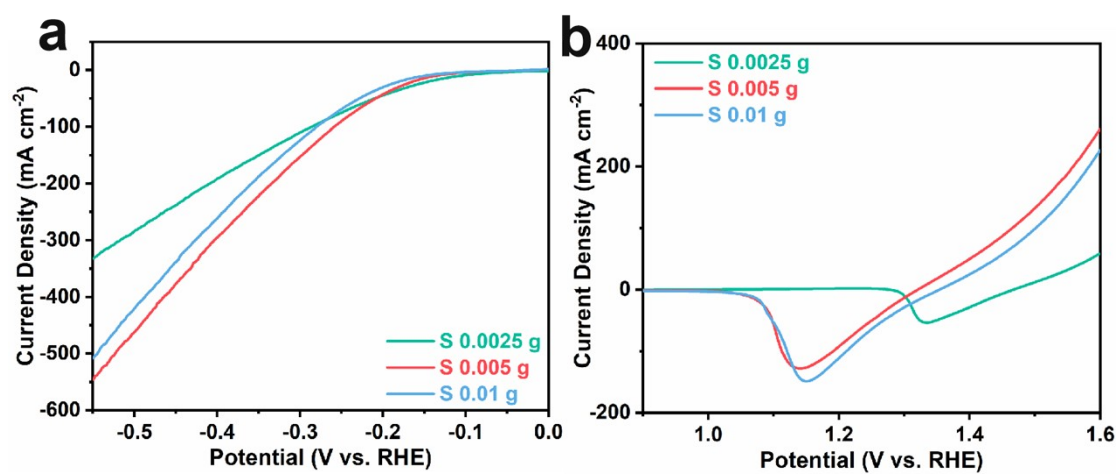

**Figure S2.** LSV curves of S,V-Ni<sub>2</sub>P/NF with different S contents (a) HER; (b) OER.

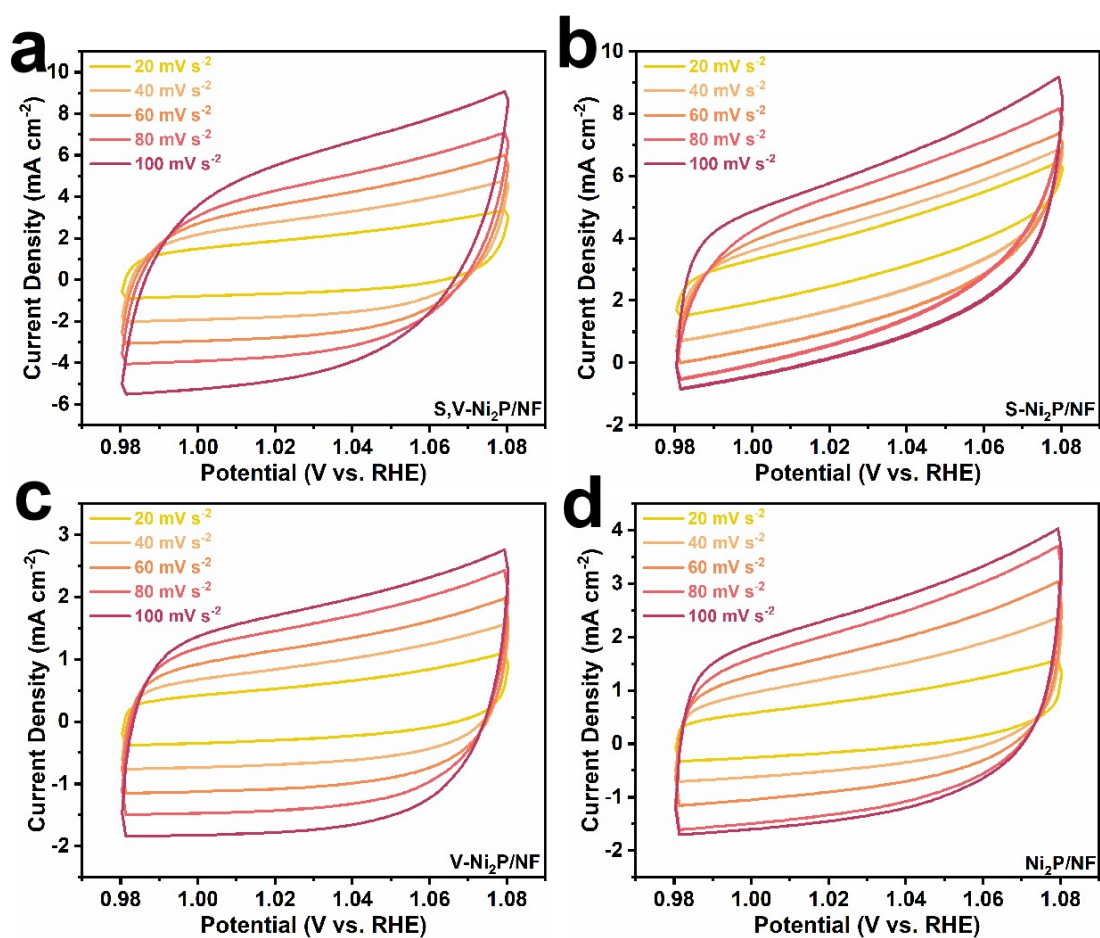

**Figure S3.** CV curves of (a) S, V-Ni<sub>2</sub>P/NF, (b) S-Ni<sub>2</sub>P/NF, (c) V-Ni<sub>2</sub>P/NF, (d) Ni<sub>2</sub>P/NF at different scan rates for OER.

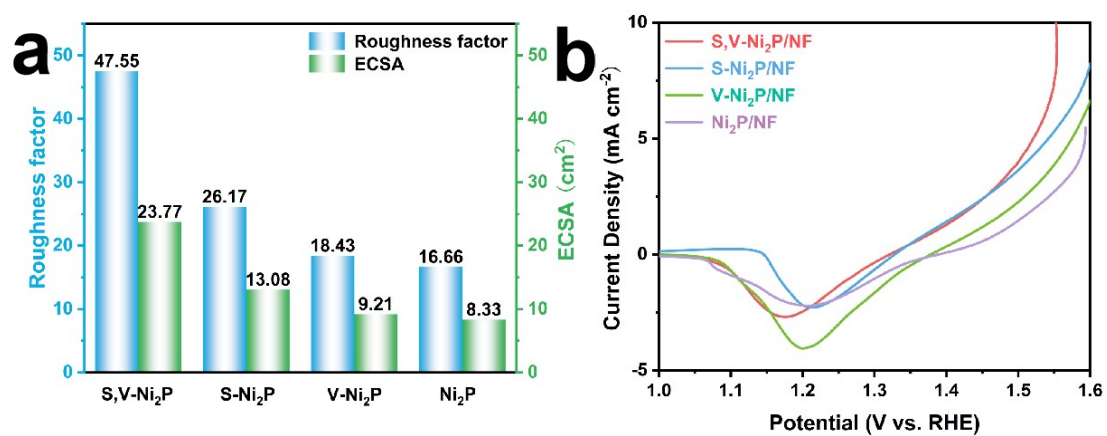

**Figure S4.** OER performance of samples: (a) the roughness factor (RF) and (b) the normalized polarization curve of ECSA.

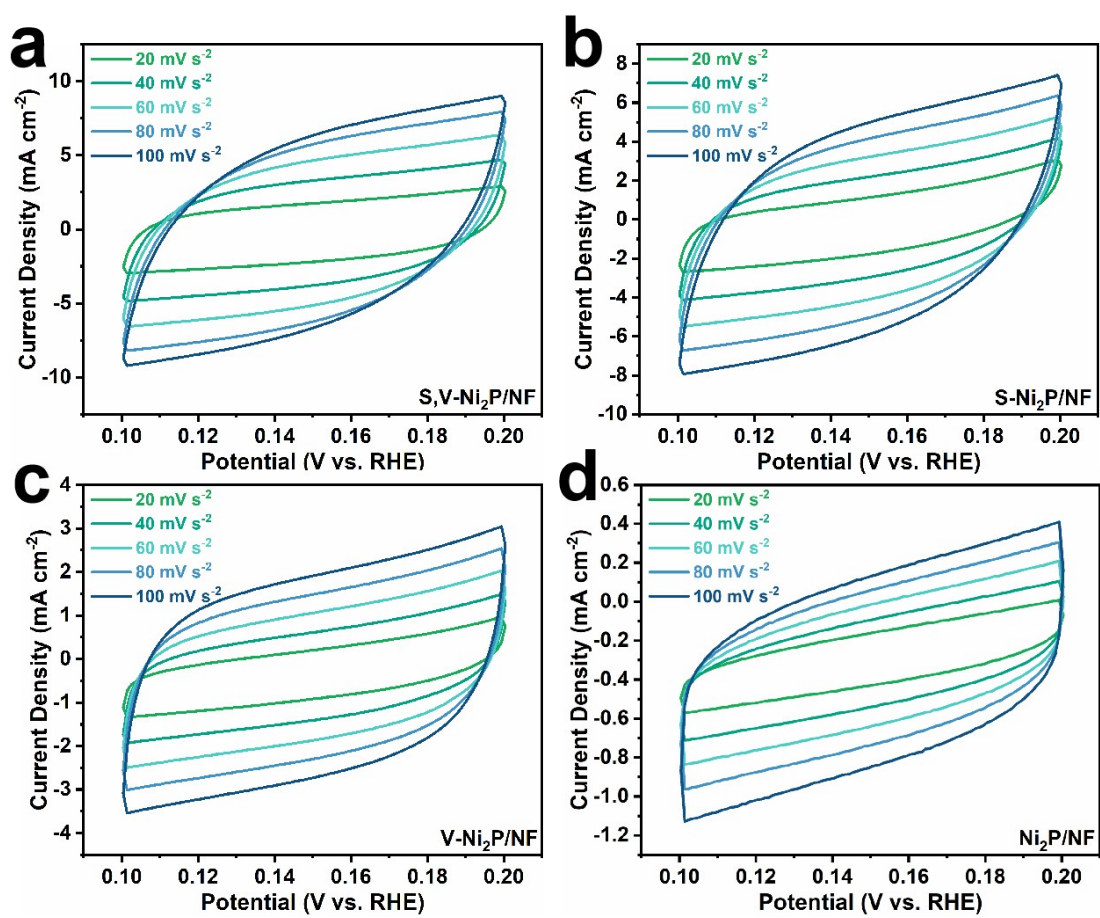

**Figure S5.** CV curves of (a) S, V-Ni<sub>2</sub>P/NF, (b) S-Ni<sub>2</sub>P/NF, (c) V-Ni<sub>2</sub>P/NF, (d) Ni<sub>2</sub>P/NF at different scan rates for HER.



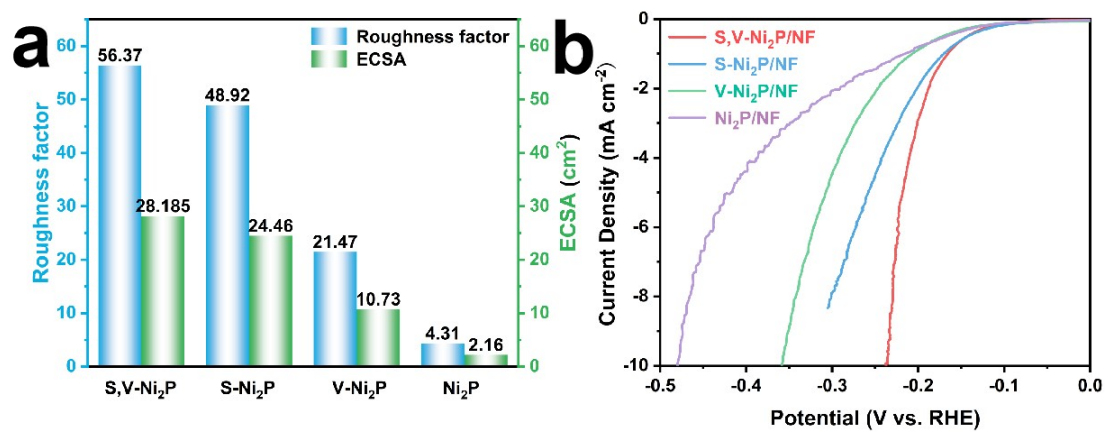

**Figure S6.** HER performance of samples: (a) the roughness factor (RF) and (b) the normalized polarization curve of ECSA.

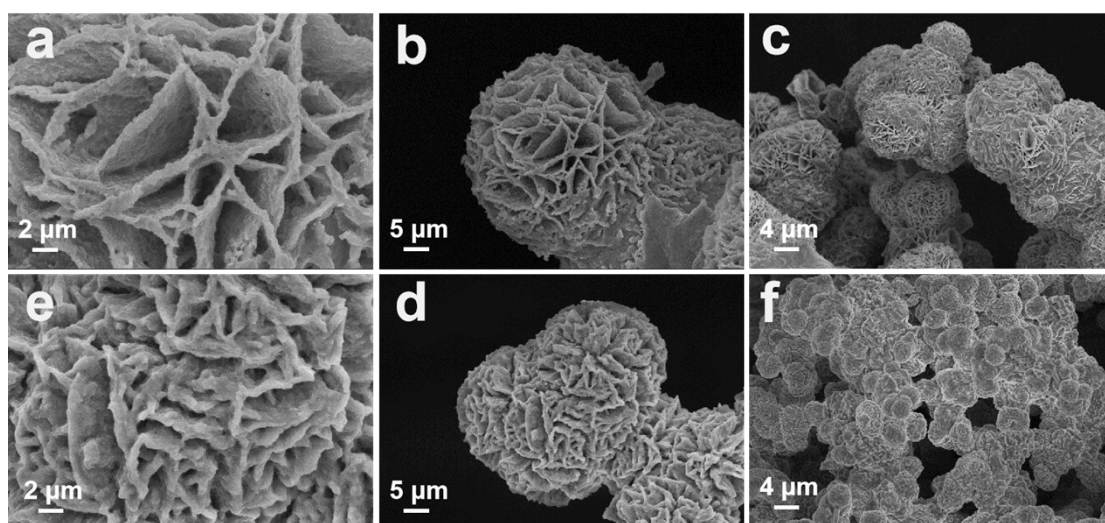

**Figure S7.** SEM images of the S, V-Ni<sub>2</sub>P/NF (a-c) after OER 5000 cycles test and (e-f) after HER 5000 cycles test

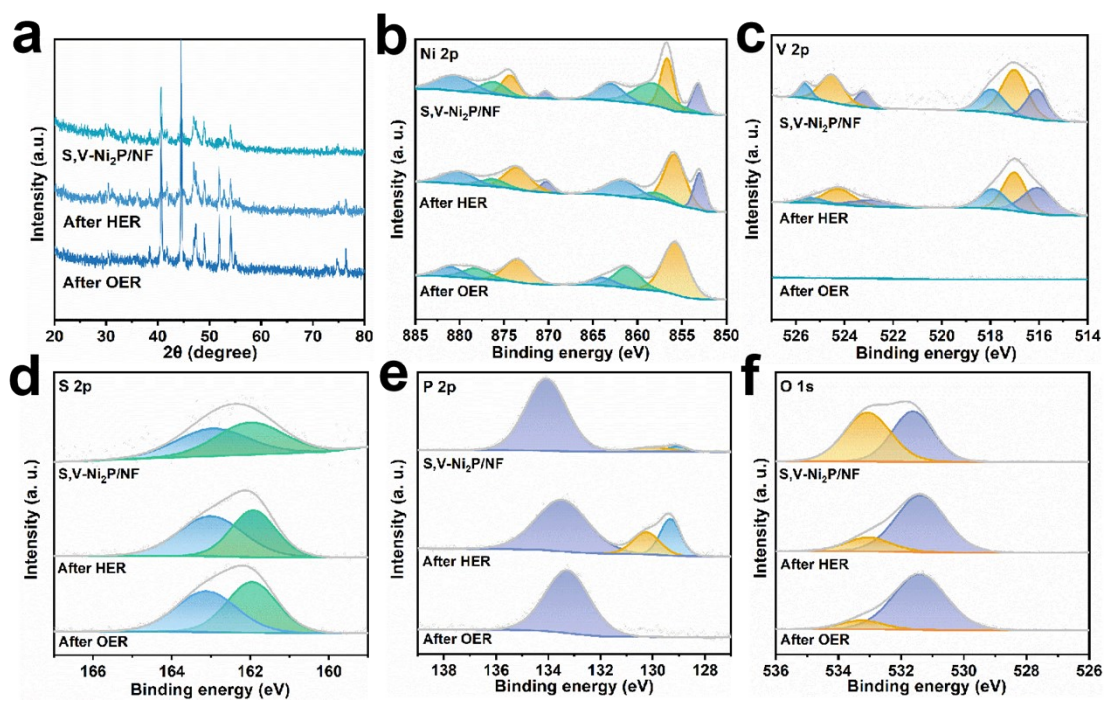

**Figure S8.** XRD patterns (a) and XPS spectra (b) of initial, after HER and OER test of S,V-Ni<sub>2</sub>P/NF in 1 M KOH.

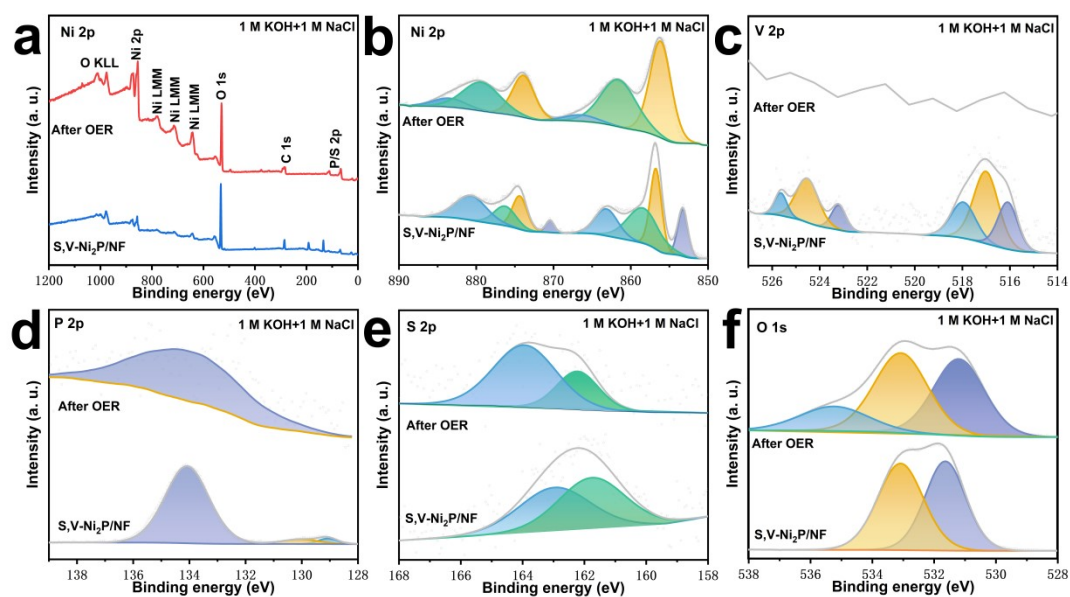

**Figure S9.** XRD patterns (a) and XPS spectra (b) of initial and after OER test of S,V-Ni<sub>2</sub>P/NF in 1 M KOH+ 1 M NaCl.

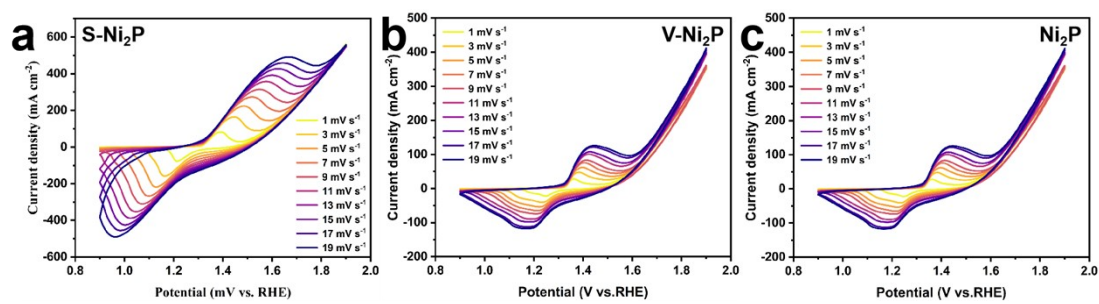

**Figure S10.** CV test at different scan rates for S-Ni<sub>2</sub>P/NF (a); V-Ni<sub>2</sub>P/NF (b); Ni<sub>2</sub>P/NF (c).

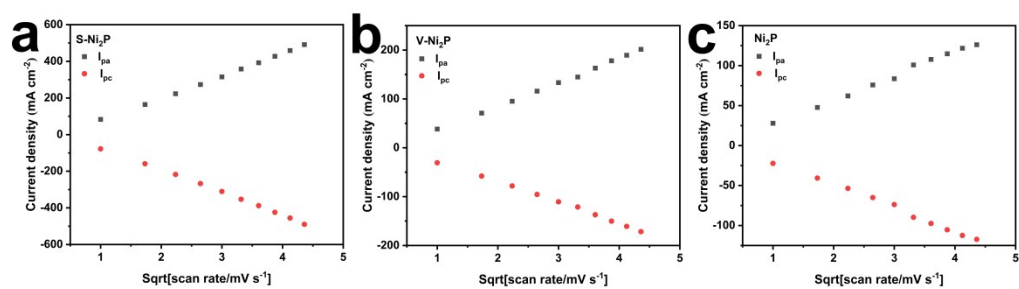

**Figure S11.** The obtained Ks values of S-Ni<sub>2</sub>P/NF (a); V-Ni<sub>2</sub>P/NF (b); Ni<sub>2</sub>P/NF (c).

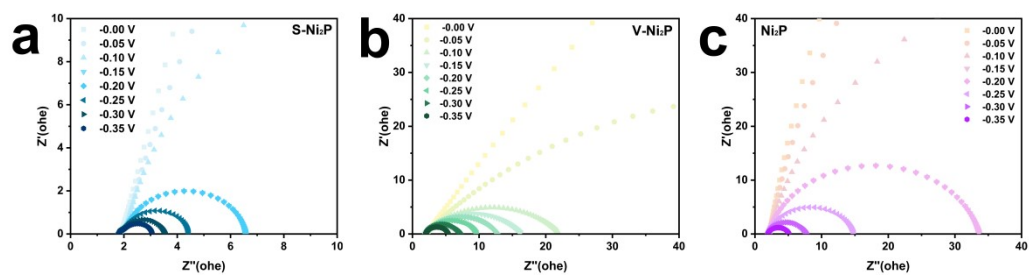

**Figure S12.** Nyquist plots at different potentials for S-Ni<sub>2</sub>P/NF (a); V-Ni<sub>2</sub>P/NF (b); Ni<sub>2</sub>P/NF (c).

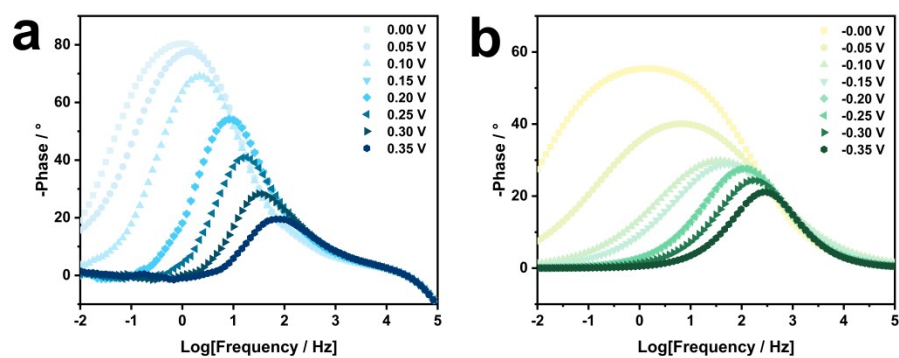

**Figure S13.** Bode plot at different potentials for S-Ni<sub>2</sub>P/NF (a); V-Ni<sub>2</sub>P/NF (b).



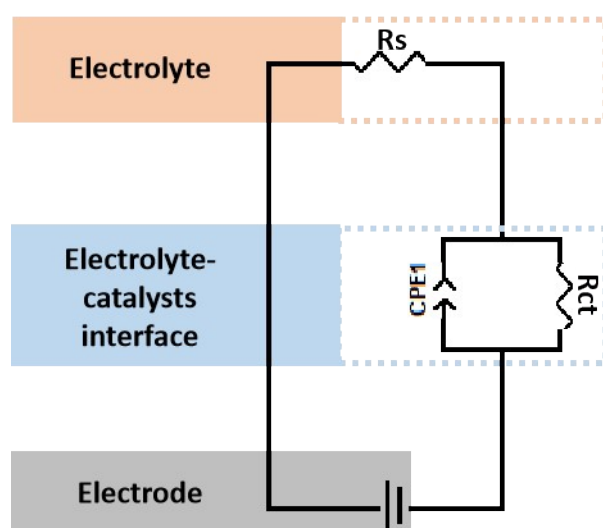

**Figure S14.** Equivalent circuit diagram of V-Ni<sub>2</sub>P/NF and Ni<sub>2</sub>P/NF.

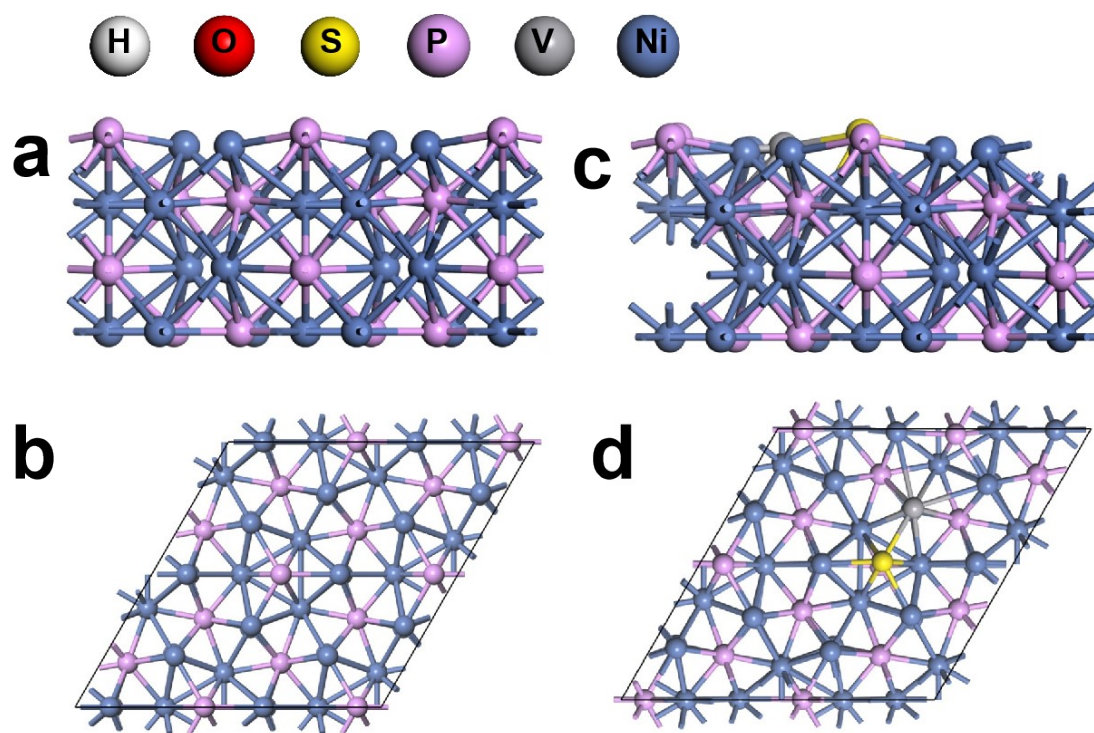

**Figure S15.** The structure models of  $\text{Ni}_2\text{P/NF}$ (a,b) and  $\text{S,V-Ni}_2\text{P/NF}$  (c,d).

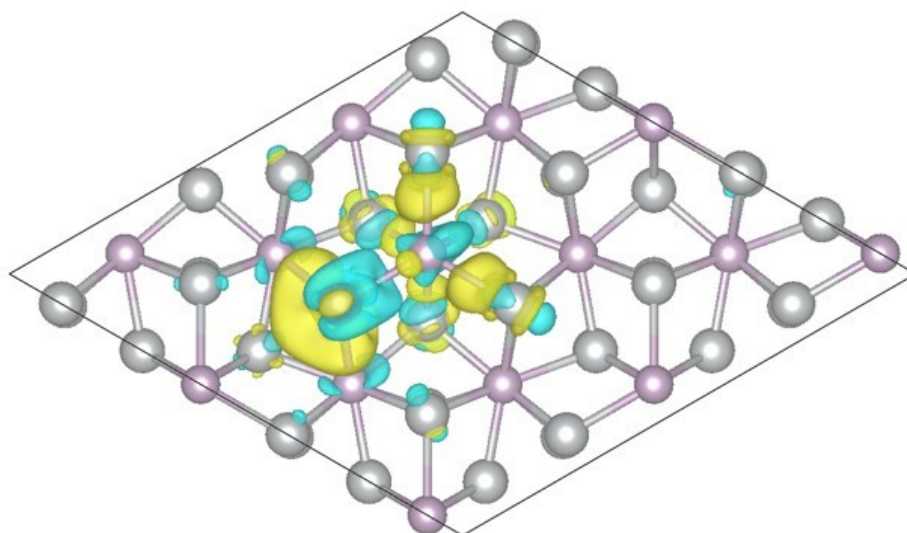

**Figure S16.** Differential charge diagram of Ni<sub>2</sub>P/NF.

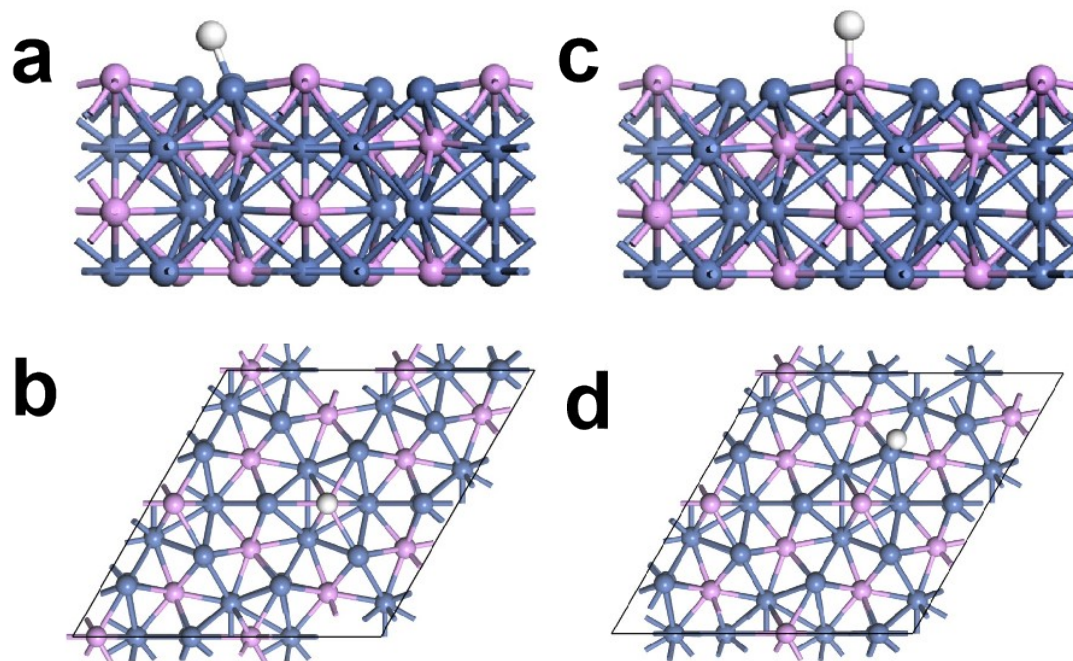

**Figure S17.** The  $\text{H}^*$  adsorption models at Ni site (a,b) and P site (c,d) on  $\text{Ni}_2\text{P}/\text{NF}$ .

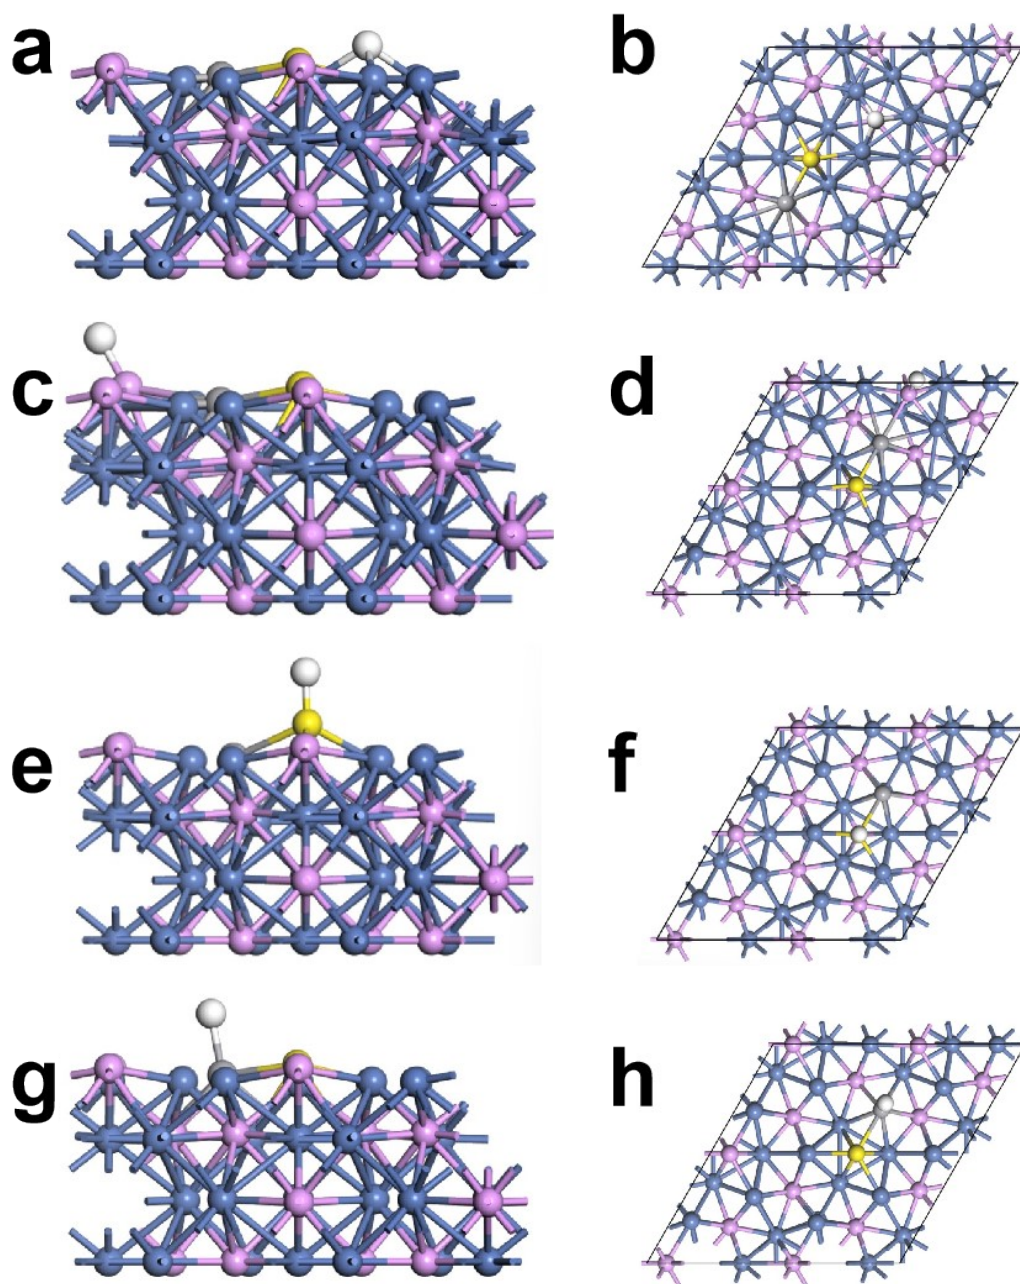

**Figure S18.** The  $\text{H}^*$  adsorption models at Ni site (a,b), P site (c,d), V site (e,f) and S site (g,h) on S,V- $\text{Ni}_2\text{P/NF}$ .



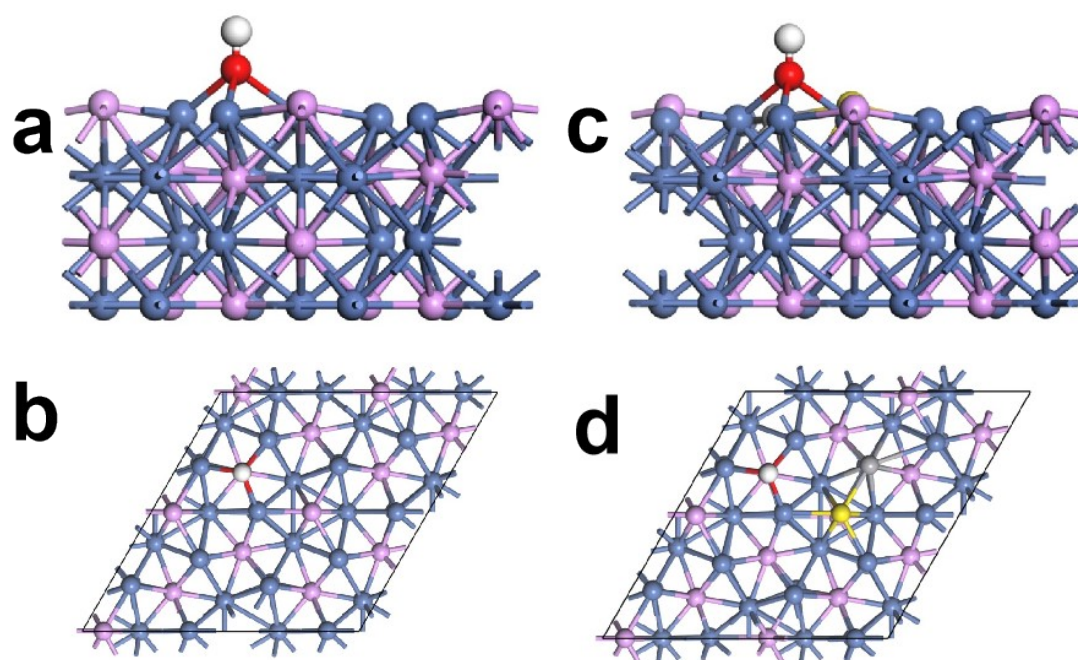

**Figure S19.** The OH\* adsorption models at on Ni<sub>2</sub>P/NF (a,b) and S,V-Ni<sub>2</sub>P/NF (c,d).

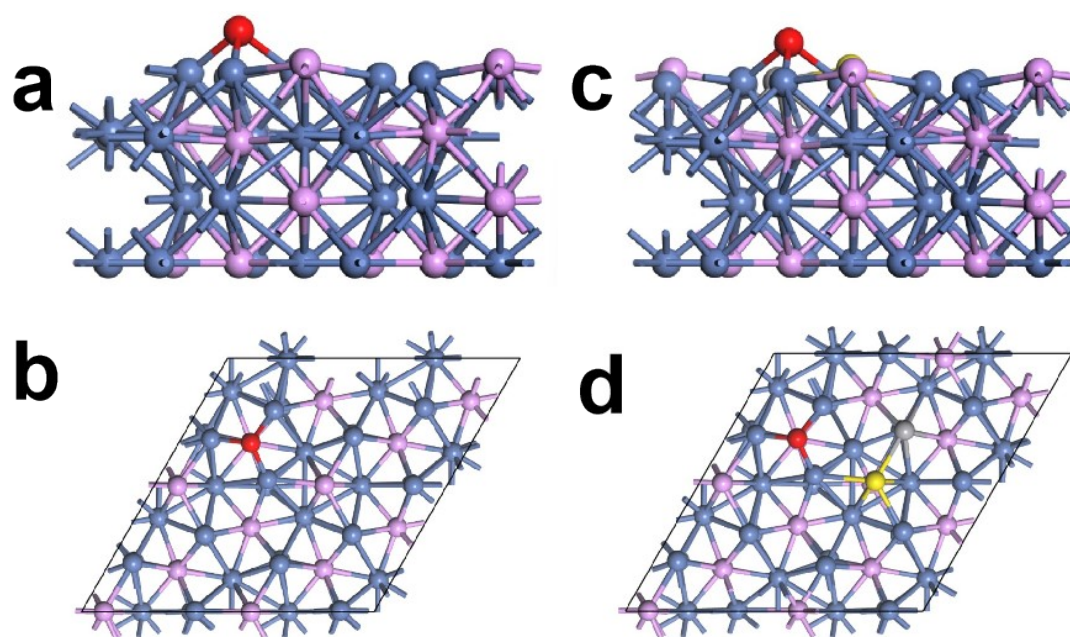

**Figure S20.** The O\* adsorption models at on Ni<sub>2</sub>P/NF (a,b) and S,V-Ni<sub>2</sub>P/NF (c,d).

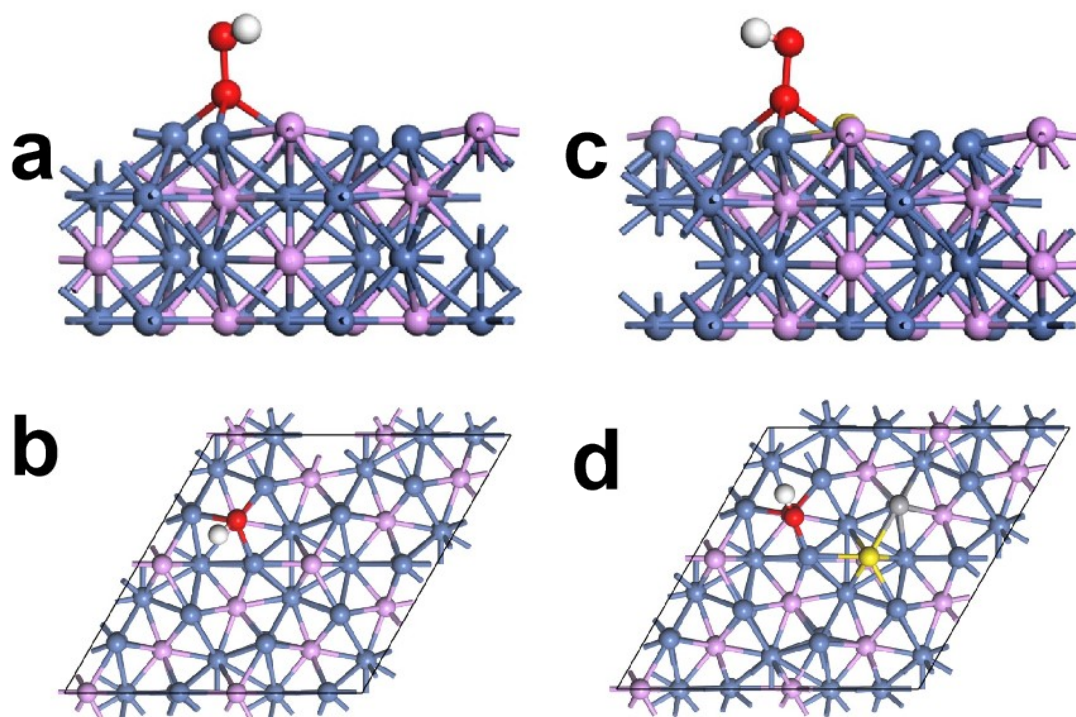

**Figure S21.** The OOH\* adsorption models at on  $\text{Ni}_2\text{P/NF}$  (a,b) and S,V- $\text{Ni}_2\text{P/NF}$  (c,d).



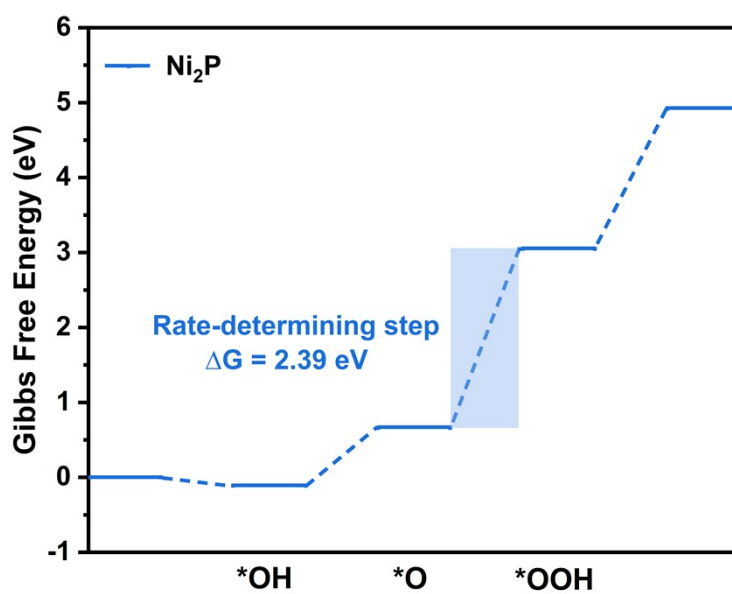

**Figure S22.** The free-energy diagram for the OER (f) of Ni<sub>2</sub>P/NF.

**Table S1.** Energy dispersive X-ray spectroscopy data of S,V-Ni<sub>2</sub>P/NF

| <b>Element</b> | <b>Wt%</b> |
|----------------|------------|
| C              | 8.22       |
| O              | 7.95       |
| P              | 23.44      |
| S              | 0.26       |
| V              | 0.41       |
| Ni             | 59.72      |

**Table S2.** Comparison of OER of S,V-Ni<sub>2</sub>P/NF with other reported Transition metal phosphides electrocatalys in 1 M KOH

| Catalysts<br>(Cathode)                          | J<br>(mA<br>cm <sup>-2</sup> ) | Overpotential<br>(mV) | Tafel slope<br>(mV decc <sup>-1</sup> ) | Stability<br>(h) | Reference |
|-------------------------------------------------|--------------------------------|-----------------------|-----------------------------------------|------------------|-----------|
| S,V-Ni <sub>2</sub> P/NF                        | 100                            | 208                   | 30.9                                    | 200              | This Work |
| Ni <sub>2</sub> P/Ni foam                       | 100                            | 316                   | 75                                      | 24               | [1]       |
| Zn <sub>0.1</sub> -CoP                          | 10                             | 290                   | 56                                      | -                | [2]       |
| V-FeNi <sub>2</sub> P/NF                        | 10                             | 200                   | 74                                      | 48               | [3]       |
| Mo-NiCoP                                        | 100                            | 261                   | 58                                      | 24               | [4]       |
| NFF(V, Na)-P                                    | 100                            | 303                   | 52.8                                    | 180              | [5]       |
| Ni <sub>2</sub> P-CoCH/CFP                      | 100                            | 320                   | 76                                      | 50               | [6]       |
| Mo-<br>Ni <sub>3</sub> S <sub>2</sub> /NixPy/NF | 100                            | 270                   | 60.6                                    | 40               | [7]       |
| Fe,Rh-Ni <sub>2</sub> P/NF                      | 30                             | 228                   | 52.7                                    | 24               | [8]       |
| NiFeOP                                          | 10                             | 217                   | 62.7                                    | 40               | [9]       |
| Ni <sub>2</sub> P-Fe <sub>2</sub> P/NF          | 100                            | 261                   | 58                                      | 24               | [10]      |

**Table S3.** Comparison of HER of S,V-Ni<sub>2</sub>P/NF with other reported Transition metal phosphides electrocatalys in 1 M KOH

| Catalysts<br>(Cathode)                          | J<br>(mA<br>cm <sup>-2</sup> ) | Overpotential<br>(mV) | Tafel slope<br>(mV decc <sup>-1</sup> ) | Stability<br>(h) | Reference |
|-------------------------------------------------|--------------------------------|-----------------------|-----------------------------------------|------------------|-----------|
| S,V-Ni <sub>2</sub> P/NF                        | 100                            | 185                   | 91.2                                    | 200              | This Work |
| Ni <sub>2</sub> P/Ni foam                       | 100                            | 222                   | 68                                      | 24               | [1]       |
| Zn <sub>0.1</sub> -CoP                          | 10                             | 98                    | 44                                      | -                | [2]       |
| V-FeNi <sub>2</sub> P/NF                        | 100                            | 222                   | 53                                      | 48               | [3]       |
| Mo-NiCoP                                        | 100                            | 225                   | 86                                      | 48               | [4]       |
| NFF(V, Na)-P                                    | 10                             | 117                   | 42.6                                    | 120              | [5]       |
| Ni <sub>2</sub> P-CoCH/CFP                      | 100                            | 143                   | 36                                      | 50               | [6]       |
| Mo-<br>Ni <sub>3</sub> S <sub>2</sub> /NixPy/NF | 10                             | 109                   | 68.4                                    | 24               | [7]       |
| Fe,Rh-Ni <sub>2</sub> P/NF                      | 10                             | 73                    | 117.3                                   | 24               | [8]       |
| NiFeOP                                          | 10                             | 153                   | 105.3                                   | 40               | [9]       |
| Ni <sub>2</sub> P-Fe <sub>2</sub> P/NF          | 100                            | 261                   | 58                                      | 24               | [10]      |

**Table S4.** Comparison of overall water splitting activities of S,V-Ni<sub>2</sub>P/NF with other reported Ni-based electrocatalysts in 1 M KOH

| Catalysts<br>(Cathode)                                   | Catalysts<br>(anode)                                     | J<br>(mA cm <sup>-2</sup> ) | Potential<br>(V) | Reference |
|----------------------------------------------------------|----------------------------------------------------------|-----------------------------|------------------|-----------|
| S,V-Ni <sub>2</sub> P                                    | S,V-Ni <sub>2</sub> P                                    | 10                          | 1.42             | This Work |
| Ni <sub>2</sub> P/Ni foam                                | Ni <sub>2</sub> P/Ni foam                                | 10                          | 1.63             | [1]       |
| Zn <sub>0.1</sub> -CoP                                   | Zn <sub>0.1</sub> -CoP                                   | 10                          | 1.57             | [2]       |
| V-FeNi <sub>2</sub> P/NF                                 | V-FeNi <sub>2</sub> P/NF                                 | 10                          | 1.57             | [3]       |
| Mo-NiCoP                                                 | Mo-NiCoP                                                 | 10                          | 1.61             | [4]       |
| NFF(V, Na)-P                                             | NFF(V, Na)-P                                             | 10                          | 1.56             | [5]       |
| Ni <sub>2</sub> P-CoCH/CFP                               | Ni <sub>2</sub> P-CoCH/CFP                               | 10                          | 1.53             | [6]       |
| Mo-Ni <sub>3</sub> S <sub>2</sub> /Ni <sub>x</sub> Py/NF | Mo-Ni <sub>3</sub> S <sub>2</sub> /Ni <sub>x</sub> Py/NF | 10                          | 1.46             | [7]       |
| Fe,Rh-Ni <sub>2</sub> P/NF                               | Fe,Rh-Ni <sub>2</sub> P/NF                               | 10                          | 1.62             | [8]       |
| NiFeOP                                                   | NiFeOP                                                   | 10                          | 1.57             | [9]       |
| Ni <sub>2</sub> P-Fe <sub>2</sub> P/NF                   | Ni <sub>2</sub> P-Fe <sub>2</sub> P/NF                   | 10                          | 1.561            | [10]      |
| NiFeP/CC                                                 | NiFeP/CC                                                 | 10                          | 1.57             | [11]      |
| NiCoP/rGO                                                | NiCoP/rGO                                                | 10                          | 1.59             | [12]      |
| CoFeP/rGO                                                | CoFeP/rGO                                                | 10                          | 1.58             | [13]      |
| Fe <sub>x</sub> -NiCoP/CC                                | Fe <sub>x</sub> -NiCoP/CC                                | 10                          | 1.61             | [14]      |
| Ni <sub>0.96</sub> Co <sub>0.04</sub> P                  | Ni <sub>0.96</sub> Co <sub>0.04</sub> P                  | 10                          | 1.45             | [15]      |

**Table S5.** Comparison of overall water splitting activities of S,V-Ni<sub>2</sub>P/NF with other reported Ni-based electrocatalys in 1.0 M KOH+0.5 M NaCl

| Catalysts                            | Electrolyte              | J (mA cm <sup>-2</sup> ) | Potential(V) | Reference |
|--------------------------------------|--------------------------|--------------------------|--------------|-----------|
| S,V-Ni <sub>2</sub> P                | 1.0 M KOH+<br>0.5 M NaCl | 10                       | 1.48         | This Work |
| NFF(V, Na)-P                         | 1.0 M KOH+<br>0.5 M NaCl | 10                       | 1.58         | [5]       |
| FMCO/NF                              | 1.0 M KOH+<br>0.5 M NaCl | 10                       | 1.58         | [16]      |
| Co-Ni-S/NF                           | 1.0 M KOH+<br>0.5 M NaCl | 10                       | 1.67         | [17]      |
| CoSe/MoSe <sub>2</sub>               | 1.0 M KOH+<br>0.5 M NaCl | 10                       | 1.69         | [18]      |
| NiNS                                 | 1.0 M KOH+<br>0.5 M NaCl | 10                       | 1.8          | [19]      |
| NiCoP                                | 1.0 M KOH+<br>0.5 M NaCl | 10                       | 1.82         | [20]      |
| PBA/NF-2h                            | 1.0 M KOH+<br>0.5 M NaCl | 10                       | 1.83         | [21]      |
| NiCoHPi@Ni <sub>3</sub> N/NF         | 1.0 M KOH+<br>0.5 M NaCl | 10                       | 1.86         | [22]      |
| Mo-CoP <sub>x</sub> /NF              | 1.0 M KOH+<br>0.5 M NaCl | 10                       | 1.95         | [23]      |
| CoNi <sub>2</sub> S <sub>4</sub> /CC | 1.0 M KOH+<br>0.5 M NaCl | 10                       | 2.04         | [24]      |

**Table S6.** Fitting results of S,V-Ni<sub>2</sub>P/NF electrodes impedance spectra

| S,V-Ni <sub>2</sub> P/NF | R <sub>s</sub> | CPE1-T | CPE1-P | R <sub>ct</sub> | CPE2-T | CPE2-P | R <sub>mt</sub> |
|--------------------------|----------------|--------|--------|-----------------|--------|--------|-----------------|
| 0.9                      | 1.872          | 0.035  | 0.794  | 0.300           | 0.034  | 0.927  | 275.2           |
| 0.95                     | 1.820          | 0.005  | 0.936  | 0.201           | 0.017  | 0.872  | 151.9           |
| 1.00                     | 1.819          | 0.009  | 0.877  | 0.237           | 0.016  | 0.891  | 41.11           |
| 1.05                     | 1.818          | 0.013  | 0.82   | 0.293           | 0.014  | 0.920  | 4.458           |
| 1.10                     | 1.181          | 0.013  | 0.820  | 0.293           | 0.014  | 0.920  | 4.458           |
| 1.15                     | 1.802          | 0.009  | 854    | 0.269           | 0.013  | 0.931  | 3.373           |
| 1.20                     | 1.804          | 0.004  | 0.94   | 0.185           | 0.014  | 0.896  | 1.541           |
| 1.25                     | 1.805          | 0.004  | 0.94   | 0.198           | 0.013  | 0.919  | 0.059           |

**Table S7.** Fitting results of S-Ni<sub>2</sub>P/NF electrodes impedance spectra

| S-Ni <sub>2</sub> P/NF | R <sub>s</sub> | CPE1-T    | CPE1-P  | R <sub>ct</sub> | CPE2-T   | CPE2-P  | R <sub>mt</sub> |
|------------------------|----------------|-----------|---------|-----------------|----------|---------|-----------------|
| 0.9                    | 1.882          | 0.00183   | 1.029   | 0.11087         | 0.034542 | 0.8079  | 401.8           |
| 0.95                   | 1.885          | 0.0011627 | 1.081   | 0.097881        | 0.03406  | 0.81668 | 141.5           |
| 1.00                   | 1.894          | 0.012469  | 0.81638 | 0.19556         | 0.028678 | 0.88275 | 22.97           |
| 1.05                   | 1.904          | 0.012666  | 0.81632 | 0.20277         | 0.02725  | 0.89981 | 6.83            |
| 1.10                   | 1.914          | 0.015221  | 0.8052  | 0.19112         | 0.028263 | 0.89795 | 3.038           |
| 1.15                   | 1.915          | 0.0073608 | 0.87311 | 0.16205         | 0.029343 | 0.88849 | 1.717           |
| 1.20                   | 1.912          | 0.0029722 | 0.97534 | 0.12498         | 0.029809 | 0.86189 | 1.16            |
| 1.25                   | 1.912          | 0.0058063 | 0.8986  | 0.16629         | 0.025465 | 0.92252 | 0.80488         |

**Table S8.** Fitting results of V-Ni<sub>2</sub>P/NF electrodes impedance spectra

| V-Ni <sub>2</sub> P | R <sub>s</sub> | CPE1-T    | CPE1-P  | R <sub>ct</sub> |
|---------------------|----------------|-----------|---------|-----------------|
| 0.9                 | 2.086          | 0.0048413 | 0.66215 | 1126            |
| 0.95                | 1.874          | 0.0085788 | 0.56331 | 109             |
| 1.00                | 1.842          | 0.0076139 | 0.5718  | 20.35           |
| 1.05                | 1.854          | 0.005965  | 0.60946 | 14.48           |
| 1.10                | 1.912          | 0.0037152 | 0.67509 | 10.86           |
| 1.15                | 1.953          | 0.0023914 | 0.73048 | 7.739           |
| 1.20                | 1.96           | 0.0016651 | 0.76894 | 5.2             |
| 1.25                | 1.969          | 0.0010008 | 0.82593 | 3.409           |

**Table S9.** Fitting results of Ni<sub>2</sub>P/NF electrodes impedance spectra

| Ni <sub>2</sub> P | R <sub>s</sub> | CPE1-T  | CPE1-P | R <sub>ct</sub> |
|-------------------|----------------|---------|--------|-----------------|
| 0.9               | 2.129          | 0.00446 | 0.9085 | 952.7           |
| 0.95              | 2.123          | 0.0046  | 0.9081 | 953.1           |
| 1.00              | 2.082          | 0.005   | 0.869  | 134.2           |
| 1.05              | 2.019          | 0.003   | 0.862  | 31.37           |
| 1.10              | 2.022          | 0.003   | 0.861  | 31.43           |
| 1.15              | 1.986          | 0.003   | 0.831  | 13.02           |
| 1.20              | 1.941          | 0.003   | 0.8096 | 5.904           |
| 1.25              | 1.902          | 0.0025  | 0.799  | 3.252           |

- [1] Y. Wu, H. Wang, S. Ji, B. G. Pollet, X. Wang, R. Wang, *Nano Res.* 2020, 13, 2098-2105.
- [2] J. Wang, W. Li, X. Chen, A. Huang, *J. Alloys Compd.* 2023, 934, 167828.
- [3] N. Suo, C. Chen, X. Han, X. He, Z. Dou, Z. Lin, L. Cui, J. Xiang, *ACS Appl. Energy Mater.* 2020, 3, 9449-9458.
- [4] J. Lin, Y. Yan, C. Li, X. Si, H. Wang, J. Qi, J. Cao, Z. Zhong, W. Fei, J. Feng, *Nanomicro Lett.* 2019, 11, 55.
- [5] Y. X. Li, J. H. Jiang, Q. H. Wu, Y. Y. Feng, Z. X. Chen, G. C. Xu, L. Zhang, Vanadium-Doped Heterogeneous Bimetallic Phosphides Derived from Layered Double Hydroxides for Saline Water Splitting, *Small*, 2024, 20,2402250.
- [6] Shucong Zhang, Chunhui Tan, Ruipeng Yan, Xifei Zou, Fei-Long Hu, Yan Mi,\*Cheng Yan,\* and Shenlong Zhao\*, Constructing Built-in Electric Field in Heterogeneous Nanowire Arrays for Efficient Overall Water Electrolysis, *Angew. Chem. Int. Ed.* 2023, 62, e202302795;
- [7] Xu Luo, Pengxia Ji, Pengyan Wang, Ruilin Cheng, Ding Chen, Can Lin, Jianan Zhang, Jianwei He, Zuhao Shi, Neng Li, Shengqiang Xiao, Shichun Mu, Interface Engineering of Hierarchical Branched Mo-Doped Ni<sub>3</sub>S<sub>2</sub>/Ni<sub>2</sub>Py Hollow Heterostructure Nanorods for Efficient Overall Water Splitting, *Advanced Energy Materials*, 2020,10,1903891.
- [8] Meng-Ting Chen,<sup>1</sup> Jiao-Jiao Duan,<sup>1</sup> Jiu-Ju Feng, Li-Ping Mei, Yang Jiao, Lu Zhang, Ai-Jun Wang, Iron, rhodium-codoped Ni<sub>2</sub>P nanosheets arrays supported on nickel foam as an efficient bifunctional electrocatalyst for overall water splitting, *Journal of Colloid and Interface Science* 605 (2022) 888–896.
- [9] Yiming Xie, Bo Zhao, Kai Tang, Wei Qin, Changhui Tan, Junjie Yao, Youyong Li, Lin Jiang, Xianfu Wang, Yinghui Sun, In-situ phase transition induced nanoheterostructure for overall water splitting, *Chemical Engineering Journal*, 409, (2021), 128156.
- [10] Libo Wu, Luo Yu, Fanghao Zhang, Brian McElhenny, Dan Luo, Alamgir



Karim, Shuo Chen,\* and Zhifeng Ren, Heterogeneous Bimetallic Phosphide Ni<sub>2</sub>P-Fe<sub>2</sub>P as an Efficient Bifunctional Catalyst for Water/Seawater Splitting, *Adv. Funct. Mater.* 2021, 31, 2006484.

[11] S. Wang, J. Cai, C. Lv, C. Hu, H. Guan, J. Wang, Y. Shi, J. Song, A. Watanabe, X. Ge, *Chem. Eng. J.* 2021, 420, 129972.

[12] J. Li, M. Yan, X. Zhou, Z. Q. Huang, Z. Xia, C. R. Chang, Y. Ma, Y. Qu, *Adv. Funct. Mater.* 2016, 26, 6785-6796.

[13] X. Cai, Q. Song, D. Jiao, H. Yu, X. Tan, R. Wang, S. Luo, *Int. J. Hydrogen Energy.* 2022, 47, 39499-39508.

[14] M. Guo, S. Song, S. Zhang, Y. Yan, K. Zhan, J. Yang, B. Zhao, *ACS Sustain. Chem. Eng.* 2020, 8, 7436-7444.

[15] Xinding Lv, Shutong Wan, Tianyou Mou, Xue Han, Yifan Zhang, Zilong Wang, and Xia Tao, Atomic-Level Surface Engineering of Nickel Phosphide Nanoarrays for Efficient Electrocatalytic Water Splitting at Large Current Density, W. Liu, W. Que, R. Yin, J. Dai, D. Zheng, J. Feng, X. Xu, F. Wu, W. Shi, X. Liu, X. Cao, *Appl. Catal. B.* **2023**, 328, 122488.

[16] S. Gopalakrishnan, V. Saranya, G. Anandha babu, S. Harish, E. Senthil Kumar, M. Navaneethan, *J. Alloys Compd.* **2023**, 965, 171124.

[17] J. Sun, J. Li, Z. Li, C. Li, G. Ren, Z. Zhang, X. Meng, *ACS Sustain. Chem. Eng.* **2022**, 10, 9980-9990.

[18] Y. Zhao, B. Jin, A. Vasileff, Y. Jiao, S. Z. Qiao, *J. Mater. Chem. A.* **2019**, 7, 8117-8121.

[19] H. Liang, A. N. Gandi, D. H. Anjum, X. Wang, U. Schwingenschlögl, H. N. Alshareef, *Nano Letters.* **2016**, 16, 7718-7725.

[20] Y. Wang, D. Jia, W. Zhang, G. Jia, H. Xie, W. Ye, G. Zhu, P. Gao, *Chem. Commun.* **2022**, 58, 6132-6135.

[21] H. Sun, J. Sun, Y. Song, Y. Zhang, Y. Qiu, M. Sun, X. Tian, C. Li, Z. Lv, L. Zhang, *ACS Appl. Mater. Interfaces.* **2022**, 14, 22061-22070.

[22] Y. Yu, J. Li, J. Luo, Z. Kang, C. Jia, Z. Liu, W. Huang, Q. Chen, P. Deng, Y. Shen, X. Tian, *Mater. Today Nano.* **2022**, 18, 100216.

[23] X. Su, X. Shao, Y. Wang, W. Fan, C. Song, D. Wang, *ACS Appl. Nano Mater.* **2023**, *24*, 23029-23036.
